# Supplementary material for: The effectiveness of an online intervention in preventing excessive gestational weight gain: the e-moms roc randomized controlled trial
Source: Springer Nature journal article supplement (doi:10.1186/s12884-018-1767-4), 2018-05-09
Supplement: MOESM1 [file 15751126]

**Supplemental Table 1** Description of population and intent-to-treat (ITT) sample by strata

| BMI Category                                                      | Income | Population from<br>FLPDS <sup>a</sup> | e-Moms-Roc ITT<br>Sample |
|-------------------------------------------------------------------|--------|---------------------------------------|--------------------------|
| <b>Percent of Population and Sample</b>                           |        |                                       |                          |
| Normal<br>(18.5-24.9)                                             | Low    | 903 (19.6%)                           | 357 (21.1%)              |
|                                                                   | High   | 1873 (40.6%)                          | 545 (32.3%)              |
| Overweight +<br>Obese (25.0-35.0)                                 | Low    | 705 (15.3%)                           | 376 (22.3%)              |
|                                                                   | High   | 1131 (24.5%)                          | 410 (24.3%)              |
| Total                                                             |        | 4612 (100%)                           | 1689 (100%)              |
| <b>Percent with Excessive Gestational Weight Gain<sup>b</sup></b> |        |                                       |                          |
| Normal                                                            | Low    | 419 (46.4%)                           | 42/94 (44.7%)            |
|                                                                   | High   | 845 (45.0%)                           | 62/151 (41.1%)           |
| Overweight +<br>Obese                                             | Low    | 439 (62.3%)                           | 58/91 (63.7%)            |
|                                                                   | High   | 838 (74.1%)                           | 76/110 (69.1%)           |
| Total                                                             |        | 2541 (55.1%)                          | 238/446 (53.4%)          |

<sup>a</sup> Women giving birth in 2007 from Finger Lakes Perinatal Data System (FLPDS) meeting following e-Moms eligibility criteria: Delivery at participating hospitals; age 18-35 years; gestational age at delivery 37 - 42 weeks; singleton birth; maternal pre-pregnancy BMI 18.5 - <35.0; and no weight-affecting health conditions.

<sup>b</sup> These proportions use self-reported pre-pregnancy weight for the calculation of gestational weight gain. The e-Moms Roc proportions are calculated for the complete case sample subsample (n = 446) in the control arm.
