# Supplementary material for: The effectiveness of an online intervention in preventing excessive gestational weight gain: the e-moms roc randomized controlled trial
Source: Springer Nature journal article supplement (doi:10.1186/s12884-018-1767-4), 2018-05-09
Supplement: MOESM2 [file 15751126]

**Supplemental Table 2** Engagement with informational content by treatment arm (n = 1689)

| <b>Indicator of Engagement</b>                                                      | <b>Placebo Control</b> | <b>Intervention</b> |
|-------------------------------------------------------------------------------------|------------------------|---------------------|
|                                                                                     | <b>n = 563</b>         | <b>n = 1,126</b>    |
| Number of weekly e-mail messages sent, Median (25 <sup>th</sup> ,75 <sup>th</sup> ) | 28 (23, 31)            | 28 (23, 31)         |
| Number of events set using calendar feature, n (%)                                  |                        |                     |
| no events                                                                           | 416 (73.9)             | 891 (79.1)          |
| 1-5 events                                                                          | 112 (19.9)             | 194 (17.2)          |
| > 5 events                                                                          | 35 (6.2)               | 41 (3.6)            |
| Article views, n (%)                                                                |                        |                     |
| None                                                                                | 275 (48.9)             | 651 (57.8)          |
| 1- 5 (median) <sup>a</sup>                                                          | 142 (25.2)             | 265 (23.5)          |
| >5                                                                                  | 146 (25.9)             | 210 (18.7)          |
| Article votes, n (%)                                                                |                        |                     |
| None                                                                                | 493 (87.6)             | 1018 (90.4)         |
| 1- 2 (median)                                                                       | 35 (6.2)               | 56 (5.0)            |
| >2                                                                                  | 35 (6.2)               | 52 (4.6)            |
| Article comments, n (%)                                                             |                        |                     |
| None                                                                                | 509 (90.4)             | 1061 (94.2)         |
| 1 (median)                                                                          | 28 (5.0)               | 39 (3.5)            |
| >1                                                                                  | 26 (4.6)               | 26 (2.3)            |
| FAQ views, n (%)                                                                    |                        |                     |
| None                                                                                | 351 (62.3)             | 782 (69.5)          |
| 1- 4 (median)                                                                       | 105 (18.7)             | 190 (16.9)          |
| >4                                                                                  | 107 (19.0)             | 154 (13.7)          |

FAQ votes, n (%)

|               |            |             |
|---------------|------------|-------------|
| None          | 523 (92.9) | 1065 (94.6) |
| 1- 2 (median) | 23 (4.1)   | 35 (3.1)    |
| >2            | 17 (3.0)   | 26 (2.3)    |

Resource views, n (%)

|               |            |            |
|---------------|------------|------------|
| None          | 318 (56.5) | 729 (64.7) |
| 1- 4 (median) | 132 (23.5) | 216 (19.2) |
| >4            | 113 (20.1) | 181 (16.1) |

Resource votes, n (%)

|               |            |             |
|---------------|------------|-------------|
| None          | 506 (89.9) | 1025 (91.0) |
| 1- 2 (median) | 31 (5.5)   | 61 (5.4)    |
| >2            | 26 (4.6)   | 40 (3.6)    |

Resource comments, n (%)

|            |            |             |
|------------|------------|-------------|
| None       | 517 (91.8) | 1057 (93.9) |
| 1 (median) | 28 (5.0)   | 41 (3.6)    |
| >1         | 18 (3.2)   | 28 (2.5)    |

Blog entries, n (%)

|               |            |            |
|---------------|------------|------------|
| None          | 479 (85.1) | 973 (86.4) |
| 1- 2 (median) | 59 (10.5)  | 99 (8.8)   |
| >2            | 25 (4.4)   | 25 (4.8)   |

Blog views, n (%)

|               |            |            |
|---------------|------------|------------|
| None          | 262 (46.5) | 551 (48.9) |
| 1- 8 (median) | 158 (28.1) | 306 (27.2) |
| >8            | 143 (25.4) | 269 (23.9) |

|                      |            |             |
|----------------------|------------|-------------|
| Blog votes, n (%)    |            |             |
| None                 | 495 (87.9) | 1005 (89.3) |
| 1- 2 (median)        | 36 (6.4)   | 63 (5.6)    |
| >2                   | 32 (5.7)   | 58 (5.2)    |
| Blog comments, n (%) |            |             |
| None                 | 433 (76.9) | 904 (80.3)  |
| 1- 3 (median)        | 68 (12.1)  | 118 (10.5)  |
| >3                   | 62 (11.0)  | 104 (9.2)   |

---

<sup>a</sup> Overall median number of actions was used to categorize counts, among those with any of the specific action.
