# Supplementary material for: The effectiveness of an online intervention in preventing excessive gestational weight gain: the e-moms roc randomized controlled trial
Source: Springer Nature journal article supplement (doi:10.1186/s12884-018-1767-4), 2018-05-09
Supplement: MOESM3 [file 15751126]

**Supplemental Table 3** Proportion of participants with very high satisfaction scores (9 or 10)<sup>a</sup> by treatment arm

|                                                                     | Placebo Control Arm (n=319) |             | Intervention Arm (n=611) |             | P-value <sup>b</sup> |
|---------------------------------------------------------------------|-----------------------------|-------------|--------------------------|-------------|----------------------|
|                                                                     | 0-8                         | 9-10        | 0-8                      | 9-10        |                      |
| <b>Total Sample (n=930)</b>                                         |                             |             |                          |             |                      |
| Enjoyed participating                                               | 199 (62.38)                 | 120 (37.62) | 33 (54.50)               | 278 (45.50) | 0.02                 |
| Would recommend                                                     | 148 (46.39)                 | 171 (53.61) | 281 (46.14)              | 328 (53.68) | 0.94                 |
| <b>Strata 1 – Normal BMI Low Income (n=151)</b>                     |                             |             |                          |             |                      |
| Enjoyed participating                                               | 35 (66.04)                  | 18 (33.96)  | 38 (38.78)               | 60 (61.22)  | <0.01                |
| Would recommend                                                     | 25 (47.17)                  | 28 (52.83)  | 27 (27.84)               | 70 (72.16)  | 0.02                 |
| <b>Strata 2 – Normal BMI Not-Low Income (n=380)</b>                 |                             |             |                          |             |                      |
| Enjoyed participating                                               | 84 (64.12)                  | 47 (35.88)  | 159 (63.86)              | 90 (36.14)  | 0.96                 |
| Would recommend                                                     | 63 (47.73)                  | 69 (52.27)  | 139 (55.38)              | 112 (44.62) | 0.15                 |
| <b>Strata 3 – Overweight + Obese Class 1 Low Income (n=145)</b>     |                             |             |                          |             |                      |
| Enjoyed participating                                               | 26 (52.00)                  | 24 (48.00)  | 38 (40.00)               | 57 (60.00)  | 0.17                 |
| Would recommend                                                     | 17 (35.42)                  | 31 (64.58)  | 32 (33.68)               | 63 (66.32)  | 0.84                 |
| <b>Strata 4 – Overweight + Obese Class 1 Not-Low Income (n=254)</b> |                             |             |                          |             |                      |
| Enjoyed participating                                               | 54 (63.53)                  | 31 (36.47)  | 98 (57.99)               | 71 (42.01)  | 0.40                 |
| Would recommend                                                     | 43 (50.00)                  | 43 (50.00)  | 83 (50.00)               | 83 (50.00)  | >0.99                |

<sup>a</sup> Satisfaction was measured using questions from the EARLY consortium with a 0 to 10 Likert scale for responses [12].

<sup>b</sup> Chi-square test compared the proportion with satisfaction scores of 9 or 10 to 0 to 8 by randomized arm among those who completed the Pregnancy Satisfaction Survey.
