# Supplementary material for: The effectiveness of an online intervention in preventing excessive gestational weight gain: the e-moms roc randomized controlled trial
Source: Springer Nature journal article supplement (doi:10.1186/s12884-018-1767-4), 2018-05-09
Supplement: MOESM4 [file 15751126]

**Supplemental Table 4** Infant and maternal health outcomes and complications

| Outcome or complication        | Strata 1             |                         | Strata 2           |                         | Strata 3               |                         | Strata 4               |                              |
|--------------------------------|----------------------|-------------------------|--------------------|-------------------------|------------------------|-------------------------|------------------------|------------------------------|
|                                | Normal BMI           |                         | Normal BMI         |                         | Overweight + obese BMI |                         | Overweight + obese BMI |                              |
|                                | low income           |                         | high income        |                         | low income             |                         | high income            |                              |
|                                | Control<br>(n=86)    | Intervention<br>(n=179) | Control<br>(n=161) | Intervention<br>(n=319) | Control<br>(n=82)      | Intervention<br>(n=172) | Control<br>(n=108)     | Intervention<br>(n=228)      |
| <b>Maternal birth outcomes</b> |                      |                         |                    |                         |                        |                         |                        |                              |
| No birth information           | 2 (2.3) <sup>a</sup> | 5 (2.8)                 | 4 (2.5)            | 10 (3.1)                | 2 (2.4)                | 7 (4.1)                 | 2 (1.9)                | 6 (2.6)                      |
| C-section <sup>b</sup>         |                      |                         |                    |                         |                        |                         |                        |                              |
| Total / evaluated              | 11/83<br>(13.3)      | 36/174<br>(20.7)        | 27/157<br>(17.2)   | 69/308<br>(22.4)        | 22/79<br>(27.9)        | 42/164<br>(25.6)        | 31/106<br>(29.3)       | 79/222<br>(35.6)             |
| Primary/no prior C-section     | 6/76<br>(7.9)        | 21/158<br>(13.3)        | 19/148<br>(12.8)   | 46/281<br>(16.4)        | 14/69<br>(20.3)        | 21/137<br>(15.3)        | 23/94<br>(24.5)        | 42/183<br>(23.0)             |
| Repeat/prior C-section         | 5/7<br>(71.4)        | 15/16<br>(93.8)         | 8/9<br>(88.9)      | 22/27<br>(81.5)         | 8/10<br>(80.0)         | 20/27<br>(74.1)         | 8/12<br>(66.7)         | 36/39<br>(92.3) <sup>c</sup> |
| Missing C-section type         | 0                    | 0                       | 0                  | 1                       | 0                      | 1                       | 0                      | 1                            |

**Maternal antenatal**

|                            |         |         |         |          |         |          |         |          |
|----------------------------|---------|---------|---------|----------|---------|----------|---------|----------|
| <b>complications</b>       | 83      | 173     | 157     | 307      | 79      | 164      | 106     | 221      |
| Preeclampsia and eclampsia | 4 (4.8) | 9 (5.2) | 5 (3.2) | 9 (2.9)  | 2 (2.5) | 8 (4.9)  | 7 (6.6) | 8 (3.6)  |
| Maternal hypertension      | 3 (3.6) | 5 (2.9) | 5 (3.2) | 11 (3.6) | 4 (5.1) | 9 (5.5)  | 8 (7.6) | 10 (4.5) |
| Gestational diabetes       | 2 (2.4) | 4 (2.3) | 7 (4.5) | 8 (2.6)  | 2 (2.5) | 10 (6.1) | 7 (6.6) | 15 (6.8) |

**Neonatal outcomes among**

|                             |          |           |           |                       |           |           |           |           |
|-----------------------------|----------|-----------|-----------|-----------------------|-----------|-----------|-----------|-----------|
| <b>deliveries ≥28 weeks</b> | 84       | 174       | 157       | 309                   | 80        | 165       | 106       | 222       |
| Preterm delivery, <37 wks   | 4 (4.8)  | 7 (4.0)   | 9 (5.7)   | 8 (2.6)               | 6 (7.5)   | 9 (5.5)   | 7 (6.6)   | 17 (7.7)  |
| Missing birthweight         | 1        | 0         | 0         | 2                     | 3         | 1         | 1         | 1         |
| Infant birth weight (g)     | 3,298±60 | 3,288±490 | 3,437±47  | 3,390±445             | 3,288±526 | 3,366±528 | 3,456±557 | 3,450±534 |
|                             | 1        |           | 5         |                       |           |           |           |           |
| Birthweight < 2500 g        | 6 (7.2)  | 9 (5.2)   | 5 (3.2)   | 8 (2.6)               | 4 (5.2)   | 8 (4.9)   | 6 (5.7)   | 12 (5.4)  |
| Birthweight >4000 g         | 7 (8.4)  | 11 (6.3)  | 22 (14.0) | 21 (6.8) <sup>c</sup> | 6 (7.8)   | 15 (9.2)  | 15 (14.2) | 28 (12.6) |

<sup>a</sup> Numbers in parentheses within body of table are %.

<sup>b</sup> C-section is Caesarian section. Each entry is shown with appropriate denominator for the type of C-section.

<sup>c</sup> Fisher's exact test for comparison of control and intervention arms within strata with 2-sided significance level  $\leq 0.05$ . Results without superscript are not statistically significant.
